# Supplementary material
Source: PubMed Central journal article supplement (PMC7608014)
Supplement: mmc1.pdf [file mmc1.pdf]

**Cell, Volume 183**

## **Supplemental Information**

### **Compromised Humoral Functional Evolution**

#### **Tracks with SARS-CoV-2 Mortality**

**Tomer Zohar, Carolin Loos, Stephanie Fischinger, Caroline Atyeo, Chuangqi Wang, Matthew D. Slein, John Burke, Jingyou Yu, Jared Feldman, Blake Marie Hauser, Tim Caradonna, Aaron G. Schmidt, Yongfei Cai, Hendrik Streeck, Edward T. Ryan, Dan H. Barouch, Richelle C. Charles, Douglas A. Lauffenburger, and Galit Alter**

| <b>Characteristic</b>                                           | <b>Moderate (n = 82)</b> | <b>Severe (n = 76)</b> | <b>Deceased (n = 35)</b> |
|-----------------------------------------------------------------|--------------------------|------------------------|--------------------------|
| Female sex - no. (%)                                            | 29 (35.3)                | 29 (38.2)              | 8 (22.9)                 |
| Age range - no. (%)                                             |                          |                        |                          |
| Younger than 50                                                 | 26 (31.7)                | 25 (32.9)              | 3 (8.58)                 |
| 50-59                                                           | 11 (13.4)                | 21 (27.6)              | 6 (17.1)                 |
| 60-69                                                           | 16 (19.5)                | 17 (22.4)              | 6 (17.1)                 |
| 70-79                                                           | 17 (20.1)                | 7 (9.21)               | 7 (0.2)                  |
| 80 and older                                                    | 12 (14.6)                | 6 (7.90)               | 13 (37.1)                |
| Clinical outcome - no. (%)                                      |                          |                        |                          |
| D/C home                                                        | 59 (72.0)                | 21 (27.6)              | 0 (0)                    |
| D/C rehab/longterm care facility                                | 21 (26.8)                | 55 (72.3)              | 0 (0)                    |
| Death                                                           | 1 (1.22)                 | 0 (0)                  | 35 (100)                 |
| Days from onset of symptoms to sample collection - median (IQR) | 7 (6.75)                 | 9 (8.25)               | 6 (8)                    |
| Number of time points - median (IQR)                            | 1 (1)                    | 2 (1.25)               | 2 (1.5)                  |
| Acute respiratory distress syndrome - no. (%) <sup>a</sup>      | 2 (2.44)                 | 43 (70.5)              | 20 (74..1)               |
| Immunosuppressed - no. (%)                                      | 6 (7.32)                 | 3 (3.95)               | 5 (14.3)                 |
| Past pulmonary disease - no (%) <sup>b</sup>                    | 19 (23.5)                | 17 (23.3)              | 15 (46.9)                |
| Body-mass-index - median (IQR) <sup>c</sup>                     | 27.8 (8)                 | 30.9 (6.55)            | 28.5 (8.83)              |
| Treatment - no. (%)                                             |                          |                        |                          |
| Remdesivir                                                      | 4 (4.89)                 | 14 (18.4)              | 2 (5.71)                 |
| Inhaled nitric oxide                                            | 4 (4.89)                 | 14 (18.4)              | 7 (20.0)                 |
| Hydroxychloroquine                                              | 55 (67.1)                | 68 (89.5)              | 33 (94.3)                |
| Tocilizumab                                                     | 0 (0)                    | 2 (2.63)               | 0 (0)                    |
| Azithromycin                                                    | 44 (53.7)                | 69 (90.8)              | 28 (80.0)                |
| Ceftriaxone                                                     | 36 (43.9)                | 60 (78.9)              | 30 (85.7)                |
| Vancomycin                                                      | 9 (11.0)                 | 53 (70.0)              | 27 (77.1)                |
| Sarilumab                                                       | 2 (2.44)                 | 1 (1.32)               | 3 (8.57)                 |
| Lopinavir/Ritonavir                                             | 0 (0)                    | 3 (3.95)               | 0 (0)                    |
